# Supplementary material
Source: Royal Society of Chemistry journal article supplement (doi:10.1039/d6gc01471b)
Supplement: d6gc01471b1.pdf [file d6gc01471b1.pdf]

**Supplementary Materials for**  
**Systematic Metabolic Engineering Combined with Iterative SCRaMbLE**  
**Boost Sweetener Thaumatin Production by *Saccharomyces cerevisiae***

Yani Zhao *et al.*

\*Corresponding author: Lei Zhang, lei\_zhang@tju.edu.cn; Haishan Qi, hsqi@tju.edu.cn

**This PDF file includes:**

Supplementary Text  
Figs. S1 to S12  
Tables S1 to S3

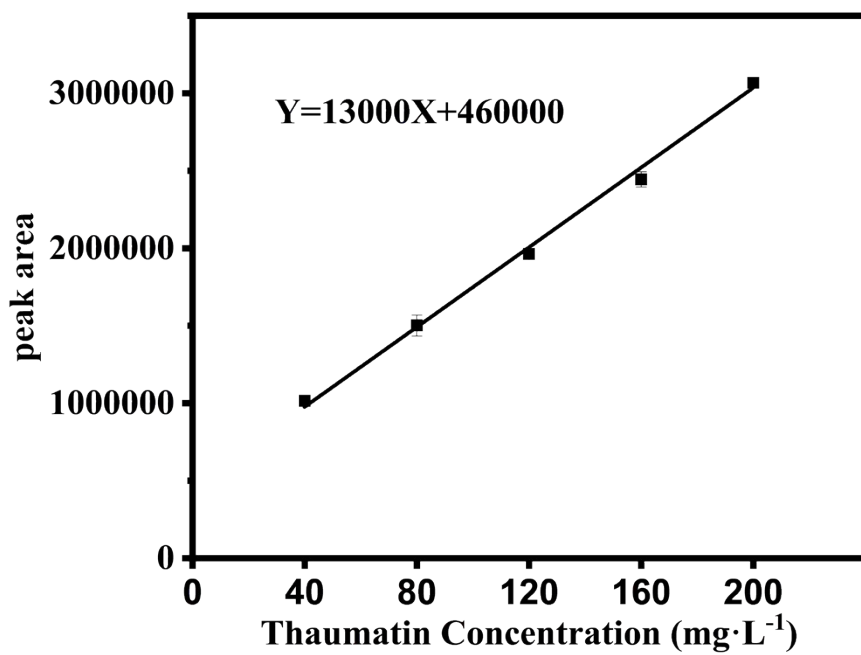

Figure. S1. Standard curve of thaumatin (40-200 mg·L<sup>-1</sup>) determined by HPLC.

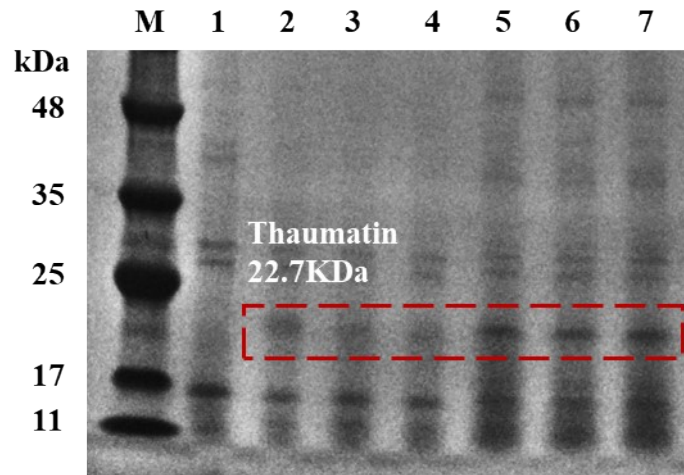

**Figure. S2. SDS-PAGE analysis of intracellular and extracellular proteins of the yYPL11 strain.** Lane M: protein molecular weight marker; Lane 1: negative control strain (empty vector-transformed strain); Lanes 2, 3, and 4: extracellular proteins (three biological replicates). Lanes 5, 6, and 7: intracellular proteins (three biological replicates). The thaumatin band is highlighted by the red dashed box.

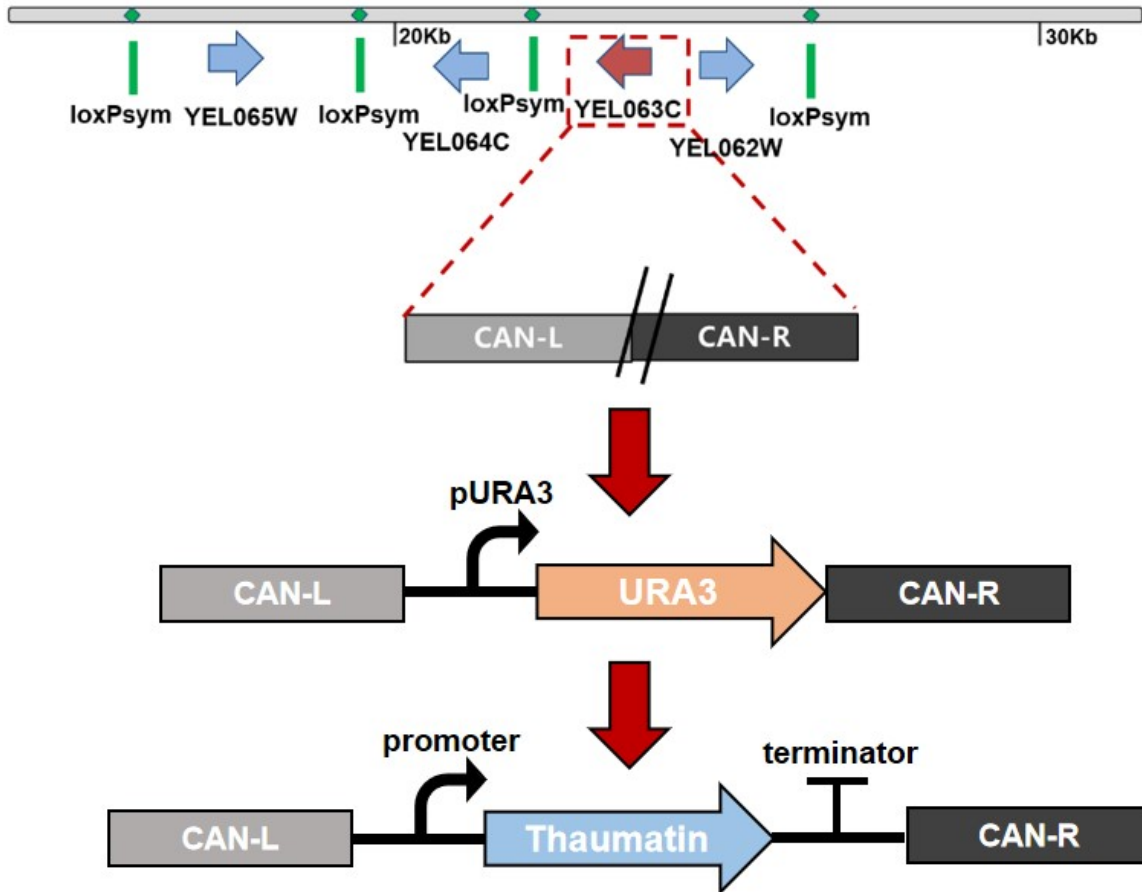

**Figure. S3. Genomic Construction of Strains for Thaumatin Expression.**

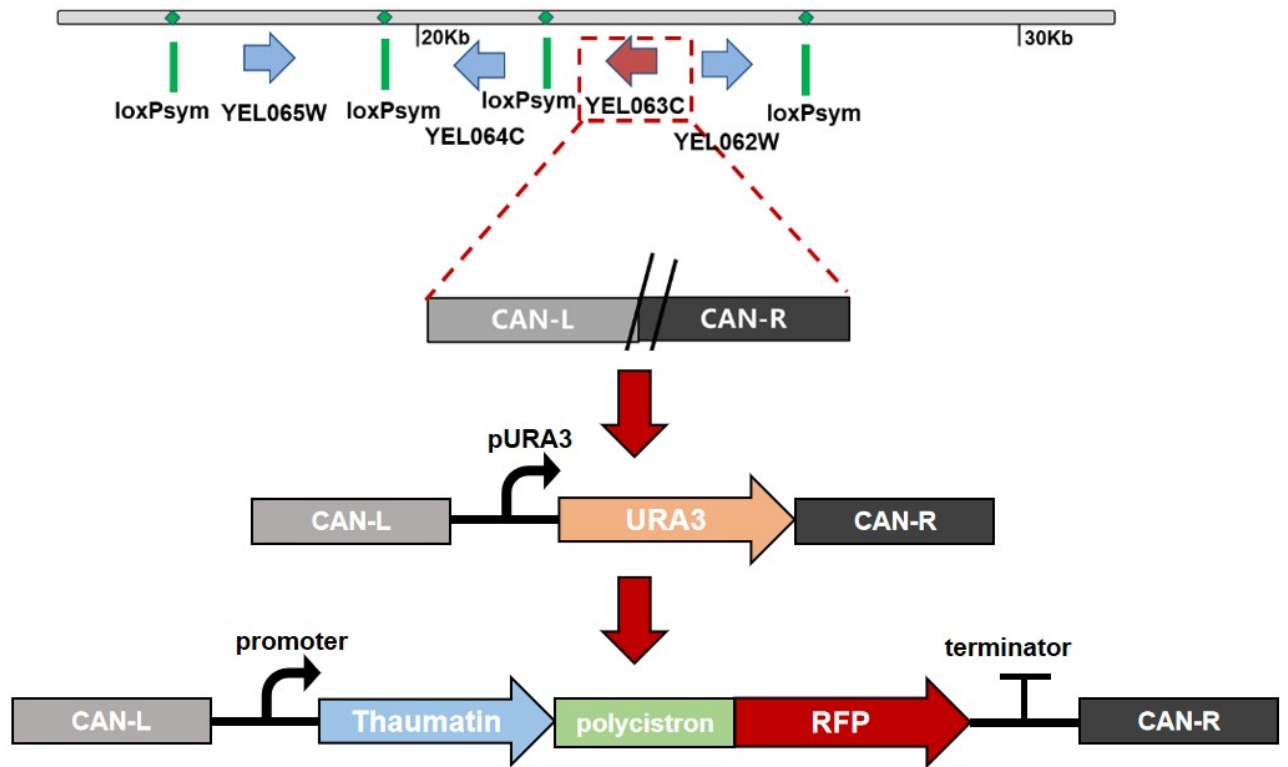

**Figure. S4. Construction of SCRaMBLE Strain Producing Thaumatin.**

**A**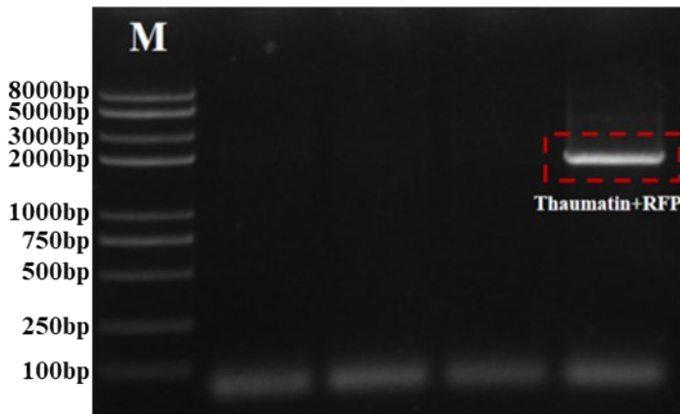**B**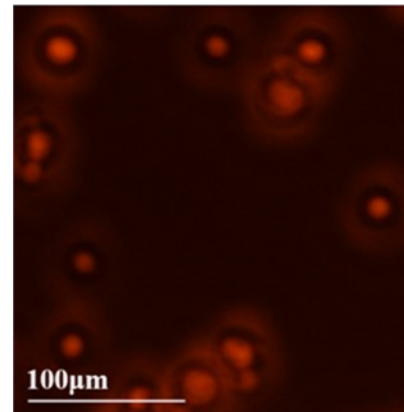

**Figure. S5. Verification of SCRaMbLE Strain Producing Thaumatoin.** (A) Colony PCR validation; (B) Microscopic observation of red fluorescence. Scale bars, 100 µm.

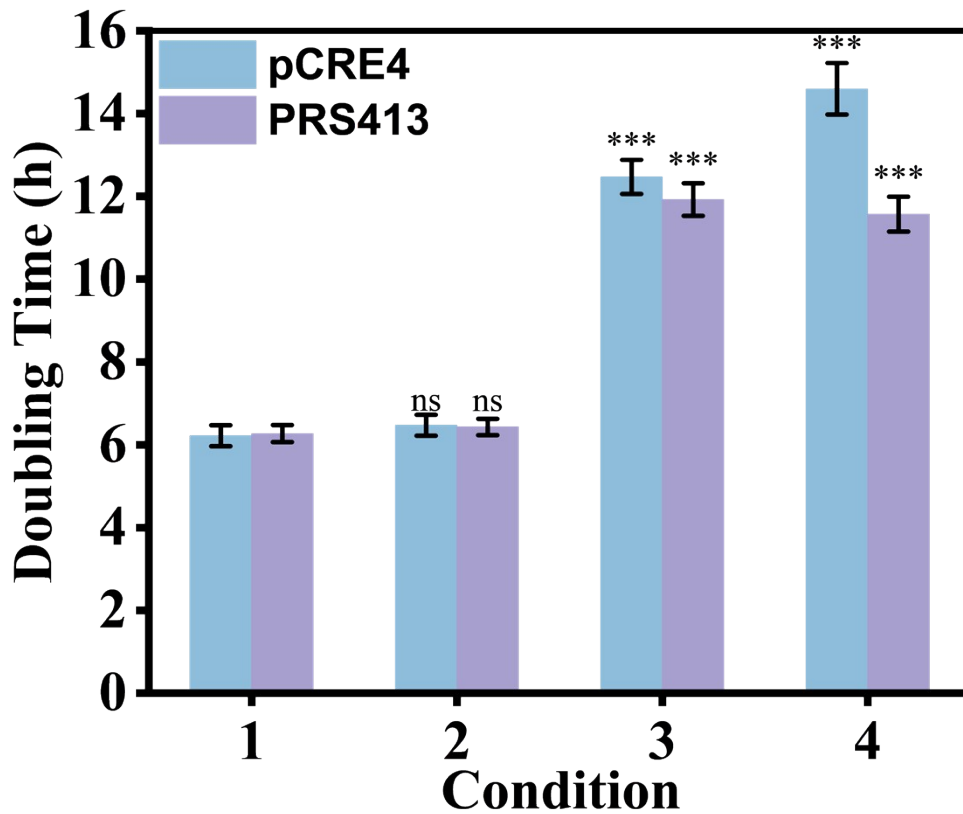

**Figure. S6. Comparison of the growth of yYPL0-1 strains containing pCRE4 and pRS413 under four conditions as follows: (1) SC-His medium; (2) SC-His medium with 1  $\mu$ M estradiol; (3) SC-His medium with 20 g/L galactose; (4) SC-his $\Delta$ -gal-estradiol medium. All data represent the mean  $\pm$  SD. Triplicate independent samples were adopted for each panel(t test, \*P $\leq$ 0.05, \*\*P $\leq$ 0.01, \*\*\*P $\leq$ 0.001).**

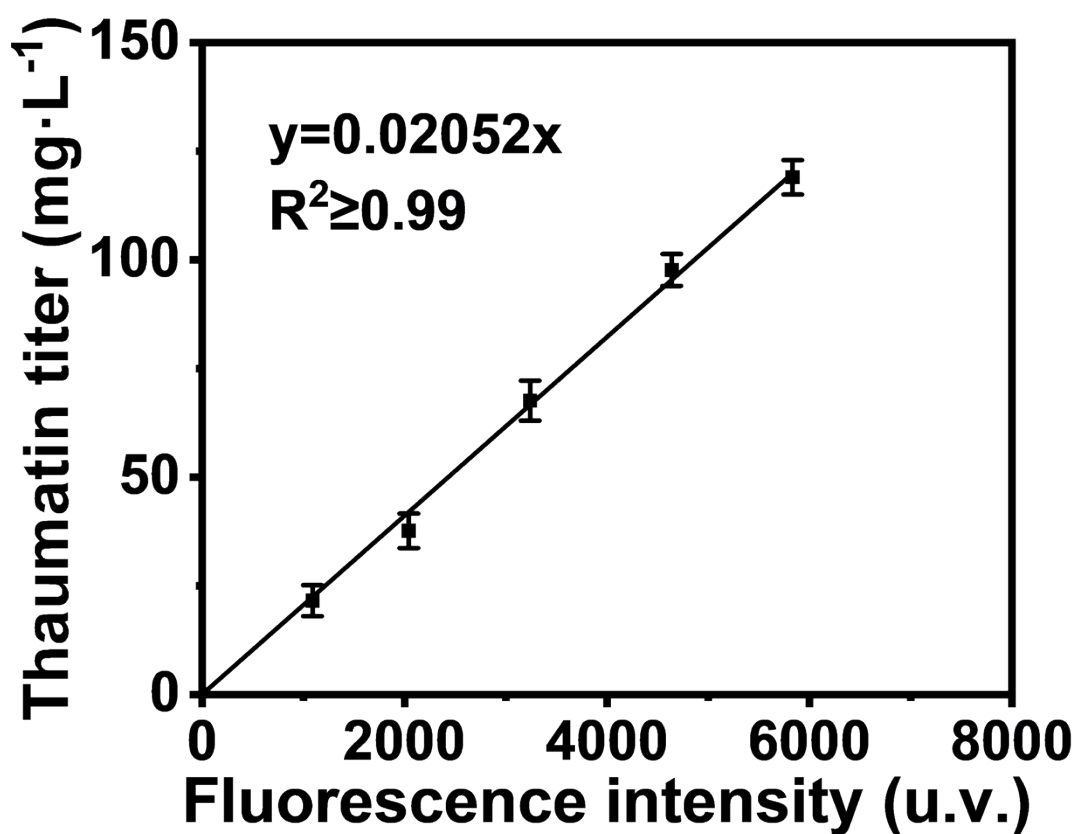

**Figure. S7. Correlation Between Thaumatin Production and Fluorescence Intensity in the Initial SCRaMbLE Strain.** All data represent the mean  $\pm$  SD. Triplicate independent samples were adopted for each panel.

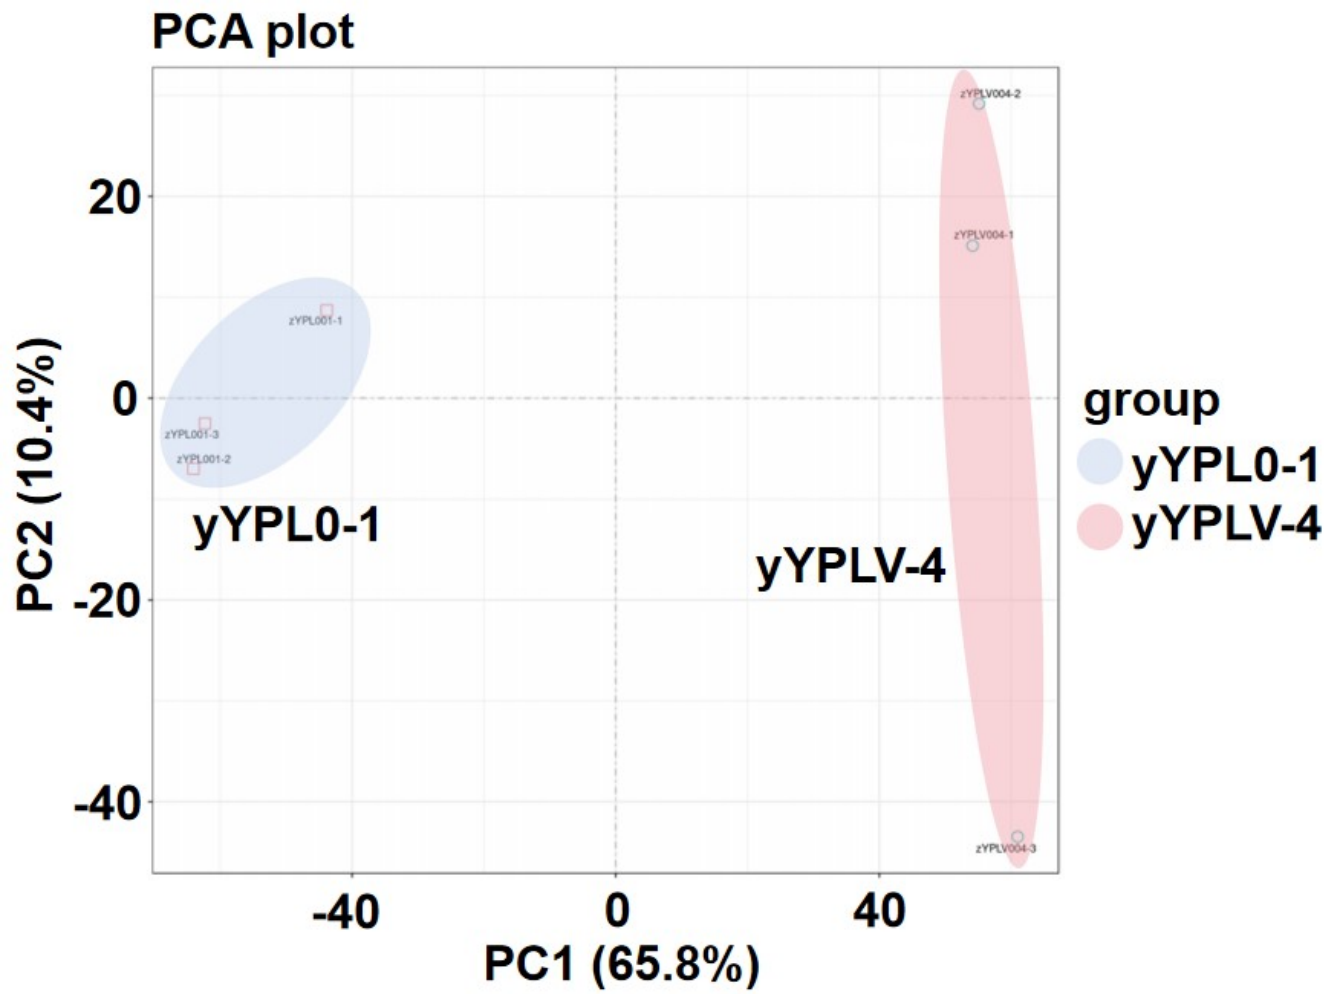

Figure. S8. Plot of principal component analysis results.

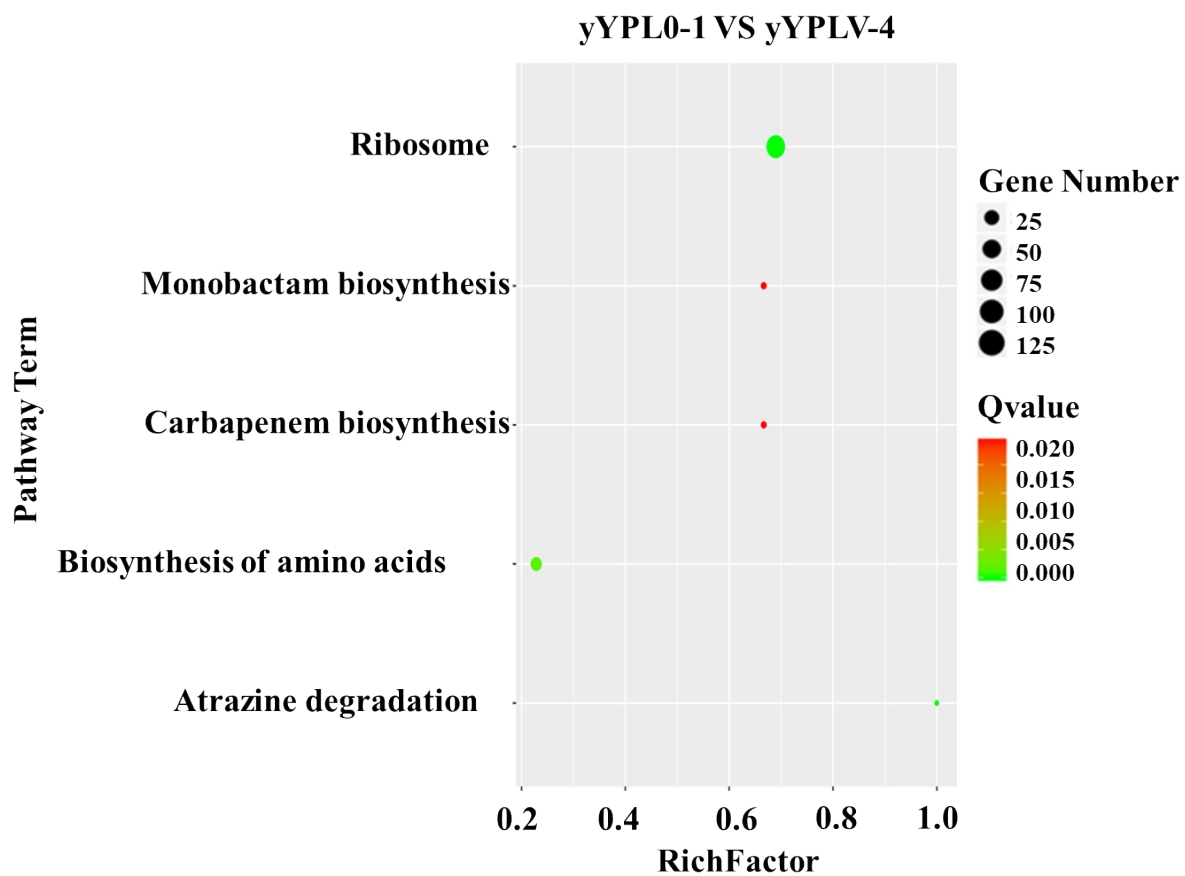

**Figure. S9. KEGG Enrichment Plot of Differential Genes.**

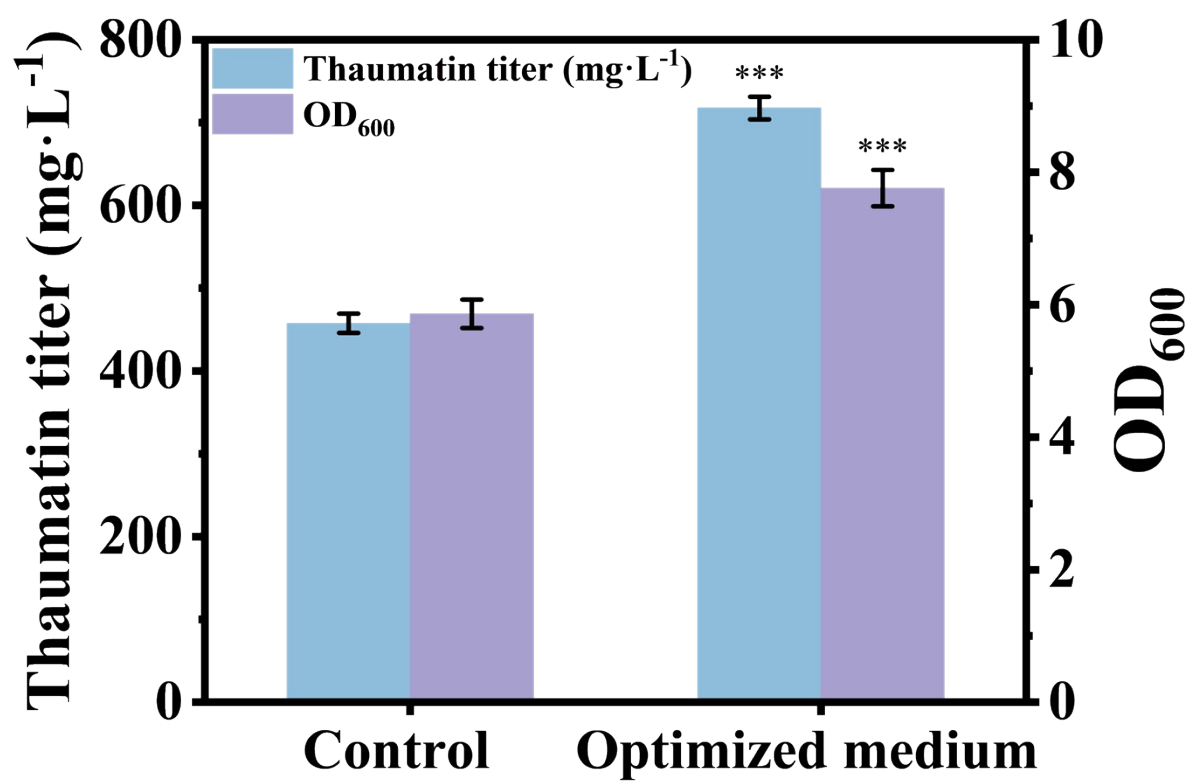

Figure. S10. Overall optimization of fermentation conditions and culture medium. All data represent the mean  $\pm$  SD. Triplicate independent samples were adopted for each panel (t test, \* $P \leq 0.05$ , \*\* $P \leq 0.01$ , \*\*\* $P \leq 0.001$ ).

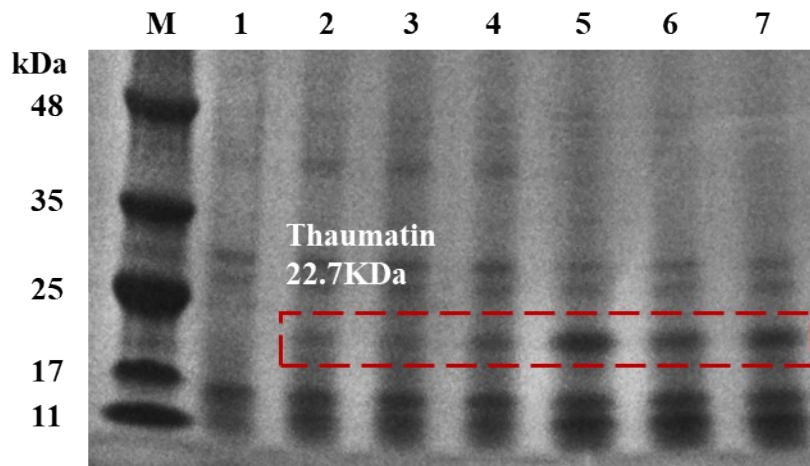

**Figure. S11. SDS-PAGE analysis of thaumatin production from the original strain yYPL032 and the engineered strain yYPL101.** Samples were collected after 72 h of shake-flask fermentation. Lane M: protein molecular weight marker; Lane 1: negative control strain (empty vector-transformed strain); Lanes 2, 3, and 4: total cellular proteins of strain yYPL032 (three biological replicates); Lanes 5, 6, and 7: total cellular proteins of strain yYPL101 (three biological replicates); The thaumatin band is highlighted by the red dashed box.

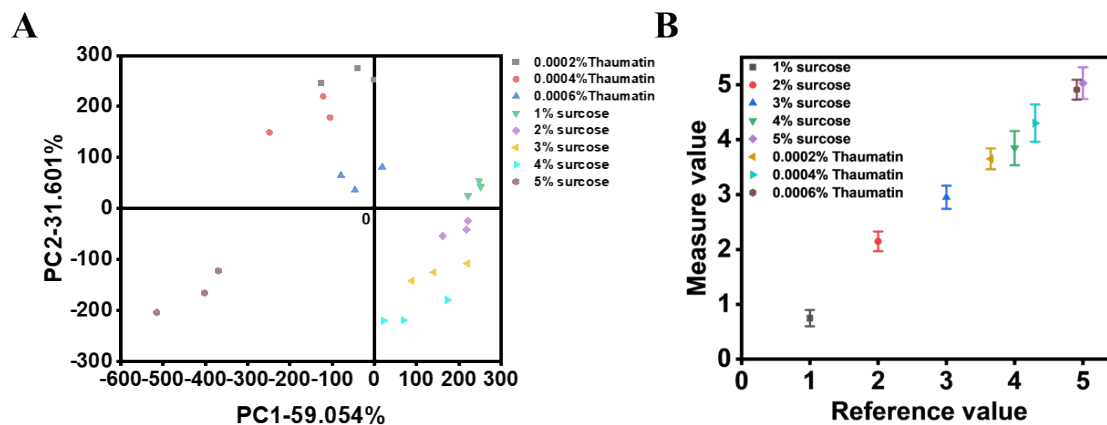

**Figure. S12. Concentration and Sucrose Effects: PCA and PLS Score Plots.** (A) PCA (Principal Component Analysis) plot of thaumatin protein samples at different concentrations versus sucrose; (B) PLS (Partial Least Squares) analysis plot of thaumatin protein samples at different concentrations versus sucrose.

**Table S1.** Plasmids used in this study.

| <b>Plasmid</b> | <b>Description</b>                                 | <b>Source</b> |
|----------------|----------------------------------------------------|---------------|
| pRS426         | CEN/ARS with <i>URA3</i> marker                    | This study    |
| pYPL001        | pRS426-pTEF1- <i>Thaumatococcus</i> -CYC1t         | This study    |
| pYPL002        | pRS426-pTDH1- <i>Thaumatococcus</i> -CYC1t         | This study    |
| pYPL003        | pRS426-pTDH2- <i>Thaumatococcus</i> -CYC1t         | This study    |
| pYPL004        | pRS426-pTEF2- <i>Thaumatococcus</i> -CYC1t         | This study    |
| pYPL005        | pRS426-pTDH3- <i>Thaumatococcus</i> -CYC1t         | This study    |
| pYPL006        | pRS426-pPGK1- <i>Thaumatococcus</i> -CYC1t         | This study    |
| pYPL007        | pRS426-pTDH3- <i>Thaumatococcus</i> -GIC1t         | This study    |
| pYPL008        | pRS426-pTDH3- <i>Thaumatococcus</i> -ICY2t         | This study    |
| pYPL009        | pRS426-pTDH3- <i>Thaumatococcus</i> -ADH1t         | This study    |
| pYPL010        | pRS426-pTDH3- <i>Thaumatococcus</i> -IDP1t         | This study    |
| pYPL011        | pRS426-pTDH3- <i>Thaumatococcus</i> -DIT1t         | This study    |
| pYPL012        | pRS426-pTDH3- <i>Thaumatococcus</i> -syn14t        | This study    |
| pYPL013        | pRS426-pTDH3- <i>Thaumatococcus</i> -syn17t        | This study    |
| pYPL014        | pRS426-pTDH3- <i>Thaumatococcus</i> -syn25t        | This study    |
| pYPL015        | pRS426-pTDH3- <i>Thaumatococcus</i> -syn8t         | This study    |
| pYPL016        | pRS426-pTDH3- <i>Thaumatococcus</i> -syn3t         | This study    |
| pYPL017        | pRS426-pTDH3- <i>Thaumatococcus</i> -syn19t        | This study    |
| pYPL018        | pRS426-pTDH3- <i>FLO10-Thaumatococcus</i> -DIT1t   | This study    |
| pYPL019        | pRS426-pTDH3- <i>afactor-Thaumatococcus</i> -DIT1t | This study    |
| pYPL020        | pRS426-pTDH3- <i>PHO5-Thaumatococcus</i> -DIT1t    | This study    |
| pYPL021        | pRS426-pTDH3- <i>PSG1-Thaumatococcus</i> -DIT1t    | This study    |
| pYPL022        | pRS426-pTDH3- <i>MID2-Thaumatococcus</i> -DIT1t    | This study    |
| pYPL023        | pRS426-pTDH3- <i>SWP1-Thaumatococcus</i> -DIT1t    | This study    |
| pYPL024        | pRS426-pTDH3- <i>PIR1-Thaumatococcus</i> -DIT1t    | This study    |
| pYPL025        | pRS426-pTDH3- <i>PIR3-Thaumatococcus</i> -DIT1t    | This study    |
| pYPL026        | pRS426-pTDH3- <i>GAS5-Thaumatococcus</i> -DIT1t    | This study    |
| pYPL027        | pRS426-pTDH3- <i>CSI2-Thaumatococcus</i> -DIT1t    | This study    |
| pYPL028        | pRS426-pTDH3- <i>NCW2-Thaumatococcus</i> -DIT1t    | This study    |
| pYPL029        | pRS426-pTDH3- <i>aa9D-Thaumatococcus</i> -DIT1t    | This study    |
| pYPL030        | pRS426-pTDH3- <i>app10-Thaumatococcus</i> -DIT1t   | This study    |

|         |                                                       |            |
|---------|-------------------------------------------------------|------------|
| pYPL031 | pRS426-pTDH3- <i>appS4-Thaumatin</i> -DIT1t           | This study |
| pYPL032 | pRS426-pTDH3- <i>HAC1</i> -DIT1t                      | This study |
| pYPL033 | pRS426-pTDH3- <i>VPS34</i> -DIT1t                     | This study |
| pYPL034 | pRS426-pTDH3- <i>MSN2</i> -DIT1t                      | This study |
| pYPL035 | pRS426-pTDH3- <i>MSN4</i> -DIT1t                      | This study |
| pYPL036 | pRS426-pTDH3- <i>RIL1</i> -DIT1t                      | This study |
| pYPL037 | pRS426-pTDH3- <i>PAB1</i> -DIT1t                      | This study |
| pYPL038 | pRS426-pTDH3- <i>CDC33</i> -DIT1t                     | This study |
| pYPL039 | pRS426-pTDH3- <i>TIF4632</i> -DIT1t                   | This study |
| pYPL040 | pRS426-pTDH3- <i>KAR2</i> -DIT1t                      | This study |
| pYPL041 | pRS426-pTDH3- <i>PDII</i> -DIT1t                      | This study |
| pYPL042 | pRS426-pTDH3- <i>ERO1</i> -DIT1t                      | This study |
| pYPL043 | pRS426-pTDH3- <i>BMH2</i> -DIT1t                      | This study |
| pYPL044 | pRS426-pTDH3- <i>SSO2</i> -DIT1t                      | This study |
| pYPL045 | pRS426-pTDH3- <i>HAC1-CDC33</i> -DIT1t                | This study |
| pYPL046 | pRS426-pTDH3- <i>HAC1-PDII</i> -DIT1t                 | This study |
| pYPL047 | pRS426-pTDH3- <i>CDC33-PDII</i> -DIT1t                | This study |
| pYPL048 | pRS426-pTDH3- <i>HAC1-CDC33-PDII</i> -DIT1t           | This study |
| pRS413  | pRS413                                                | This study |
| pRS426  | CEN/ARS with Ura3 marker                              | This study |
| pCRE4   | pRS413, pGal1-Cre-EBD-tCYC1                           | This study |
| pYPL0-1 | PRS426, pTDH3-Thaumatin- <i>polycistron-RFP-DIT1t</i> | This study |
| pYPL049 | pRS426-pTDH3- <i>HAC1-CDC33-PDII-YMR323W</i> -DIT1t   | This study |
| pYPL050 | pRS426-pTDH3- <i>HAC1-CDC33-PDII-YER074W-A</i> -DIT1t | This study |
| pYPL051 | pRS426-pTDH3- <i>HAC1-CDC33-PDII-YHR033W</i> -DIT1t   | This study |
| pYPL052 | pRS426-pTDH3- <i>HAC1-CDC33-PDII-YJR009C</i> -DIT1t   | This study |
| pYPL053 | pRS426-pTDH3- <i>HAC1-CDC33-PDII-YER157W</i> -DIT1t   | This study |

---

|         |                                                                      |            |
|---------|----------------------------------------------------------------------|------------|
| pYPL054 | pRS426-pTDH3- <i>HAC1-CDC33-PDII-YER091C-DIT1t</i>                   | This study |
| pYPL055 | pRS426-pTDH3- <i>HAC1-CDC33-PDII-YER138C-DIT1t</i>                   | This study |
| pYPL056 | pRS426-pTDH3- <i>HAC1-CDC33-PDII-YGL009C-DIT1t</i>                   | This study |
| pYPL057 | pRS426-pTDH3- <i>HAC1-CDC33-PDII-YEL046C-DIT1t</i>                   | This study |
| pYPL058 | pRS426-pTDH3- <i>HAC1-CDC33-PDII-MED2-DIT1t</i>                      | This study |
| pYPL059 | pRS426-pTDH3- <i>HAC1-CDC33-PDII-GPDI-DIT1t</i>                      | This study |
| pYPL060 | pRS426-pTDH3- <i>HAC1-CDC33-PDII-FHL1-DIT1t</i>                      | This study |
| pYPL061 | pRS426-pTDH3- <i>HAC1-CDC33-PDII-AFT1-DIT1t</i>                      | This study |
| pYPL062 | pRS426-pTDH3- <i>HAC1-CDC33-PDII-YER074W-A-YER157W-DIT1t</i>         | This study |
| pYPL063 | pRS426-pTDH3- <i>HAC1-CDC33-PDII-YER074W-A-YGL009C-DIT1t</i>         | This study |
| pYPL064 | pRS426-pTDH3- <i>HAC1-CDC33-PDII-YER157W-YGL009C-DIT1t</i>           | This study |
| pYPL065 | pRS426-pTDH3- <i>HAC1-CDC33-PDII-YER074W-A-YER157W-YGL009C-DIT1t</i> | This study |
| pYPL066 | PRS415-pTDH3- <i>MED2-DIT1t</i>                                      | This study |
| pYPL067 | PRS415-pTDH3- <i>GPDI-DIT1t</i>                                      | This study |
| pYPL068 | PRS415-pTDH3- <i>FHL1-DIT1t</i>                                      | This study |
| pYPL069 | PRS415-pTDH3- <i>AFT1-DIT1t</i>                                      | This study |
| pYPL070 | PRS415-pTDH3- <i>AIM22-DIT1t</i>                                     | This study |
| pYPL071 | PRS415-pTDH3- <i>YER074W-A-YGL009C-DIT1t</i>                         | This study |
| pYPL072 | PRS415-pTDH3- <i>YER074W-A-YGL009C-AIM22-FHL1-DIT1t</i>              | This study |
| pYPL073 | pYPL072 with 2×Thaumatococcus                                        | This study |
| pYPL074 | pYPL072 with 3×Thaumatococcus                                        | This study |
| pYPL075 | pYPL072 with 4×Thaumatococcus                                        | This study |

---

**Table S2.** Engineered *S. cerevisiae* strains used in this study.

| <b>Strains</b>              | <b>Description</b>                                                                                                          | <b>Sources</b> |
|-----------------------------|-----------------------------------------------------------------------------------------------------------------------------|----------------|
| <i>E. coli</i> DH5 $\alpha$ | Host of constructed plasmid                                                                                                 | Lab storage    |
| yFJ440                      | <i>MATa his3<math>\Delta</math>1 leu2<math>\Delta</math>0 met15<math>\Delta</math>0 ura3<math>\Delta</math>0 SynV&amp;X</i> | Lab storage    |
| yYPL001                     | yFJ440 with pYPL001                                                                                                         | This study     |
| yYPL002                     | yFJ440 with pYPL002                                                                                                         | This study     |
| yYPL003                     | yFJ440 with pYPL003                                                                                                         | This study     |
| yYPL004                     | yFJ440 with pYPL004                                                                                                         | This study     |
| yYPL005                     | yFJ440 with pYPL005                                                                                                         | This study     |
| yYPL006                     | yFJ440 with pYPL006                                                                                                         | This study     |
| yYPL007                     | yFJ440 with pYPL007                                                                                                         | This study     |
| yYPL008                     | yFJ440 with pYPL008                                                                                                         | This study     |
| yYPL009                     | yFJ440 with pYPL009                                                                                                         | This study     |
| yYPL010                     | yFJ440 with pYPL010                                                                                                         | This study     |
| yYPL011                     | yFJ440 with pYPL011                                                                                                         | This study     |
| yYPL012                     | yFJ440 with pYPL012                                                                                                         | This study     |
| yYPL013                     | yFJ440 with pYPL013                                                                                                         | This study     |
| yYPL014                     | yFJ440 with pYPL014                                                                                                         | This study     |
| yYPL015                     | yFJ440 with pYPL015                                                                                                         | This study     |
| yYPL016                     | yFJ440 with pYPL016                                                                                                         | This study     |
| yYPL017                     | yFJ440 with pYPL017                                                                                                         | This study     |
| yYPL018                     | yFJ440 with pYPL018                                                                                                         | This study     |
| yYPL019                     | yFJ440 with pYPL019                                                                                                         | This study     |
| yYPL020                     | yFJ440 with pYPL020                                                                                                         | This study     |
| yYPL021                     | yFJ440 with pYPL021                                                                                                         | This study     |
| yYPL022                     | yFJ440 with pYPL022                                                                                                         | This study     |
| yYPL023                     | yFJ440 with pYPL023                                                                                                         | This study     |
| yYPL024                     | yFJ440 with pYPL024                                                                                                         | This study     |
| yYPL025                     | yFJ440 with pYPL025                                                                                                         | This study     |
| yYPL026                     | yFJ440 with pYPL027                                                                                                         | This study     |
| yYPL027                     | yFJ440 with pYPL027                                                                                                         | This study     |
| yYPL028                     | yFJ440 with pYPL028                                                                                                         | This study     |
| yYPL029                     | yFJ440 with pYPL029                                                                                                         | This study     |

---

|         |                                                                                      |            |
|---------|--------------------------------------------------------------------------------------|------------|
| yYPL030 | yFJ440 with pYPL030                                                                  | This study |
| yYPL031 | yFJ440 with pYPL031                                                                  | This study |
| yYPL032 | <i>MATa his3Δ1 leu2Δ0 met15Δ0 ura3Δ0 SynV<br/>::pTDH3-NCW2-Thumatin-DIT1t &amp;X</i> | This study |
| yYPL033 | yYPL032 with pYPL032                                                                 | This study |
| yYPL034 | yYPL032 with pYPL033                                                                 | This study |
| yYPL035 | yYPL032 with pYPL034                                                                 | This study |
| yYPL036 | yYPL032 with pYPL035                                                                 | This study |
| yYPL037 | yYPL032 with pYPL036                                                                 | This study |
| yYPL038 | yYPL032 with pYPL037                                                                 | This study |
| yYPL039 | yYPL032 with pYPL038                                                                 | This study |
| yYPL040 | yYPL032 with pYPL039                                                                 | This study |
| yYPL041 | yYPL032 with pYPL040                                                                 | This study |
| yYPL042 | yYPL032 with pYPL041                                                                 | This study |
| yYPL043 | yYPL032 with pYPL042                                                                 | This study |
| yYPL044 | yYPL032 with pYPL043                                                                 | This study |
| yYPL045 | yYPL032 with pYPL044                                                                 | This study |
| yYPL046 | yYPL032 with pYPL045                                                                 | This study |
| yYPL047 | yYPL032 with pYPL046                                                                 | This study |
| yYPL048 | yYPL032 with pYPL047                                                                 | This study |
| yYPL049 | yYPL032 with pYPL048                                                                 | This study |
| yYPL050 | yYPL032 with pYPL049                                                                 | This study |
| yYPL051 | yYPL032, <i>ΔYPT1</i>                                                                | This study |
| yYPL052 | yYPL032, <i>ΔUBC1</i>                                                                | This study |
| yYPL053 | yYPL032, <i>ΔHRD1</i>                                                                | This study |
| yYPL054 | yYPL032, <i>ΔYAP3</i>                                                                | This study |
| yYPL055 | yYPL032 with pYPL032, <i>ΔYPT1</i>                                                   | This study |
| yYPL056 | yYPL032 with pYPL032, <i>ΔYAP3</i>                                                   | This study |
| yYPL057 | yYPL032 with pYPL038, <i>ΔYAP3</i>                                                   | This study |
| yYPL058 | yYPL032 with pYPL041, <i>ΔYAP3</i>                                                   | This study |
| yYPL059 | yYPL032 with pYPL045, <i>ΔYPT1</i>                                                   | This study |
| yYPL060 | yYPL032 with pYPL046, <i>ΔYPT1</i>                                                   | This study |
| yYPL061 | yYPL032 with pYPL032, <i>ΔYPT1, ΔYAP3</i>                                            | This study |

---

|           |                                                                                                 |            |
|-----------|-------------------------------------------------------------------------------------------------|------------|
| yYPL062   | yYPL032 with pYPL046, <i>ΔYAP3</i>                                                              | This study |
| yYPL063   | yYPL032 with pYPL041, <i>ΔYPT1</i> , <i>ΔYAP3</i>                                               | This study |
| yYPL064   | yYPL032 with pYPL048, <i>ΔYPT1</i>                                                              | This study |
| yYPL065   | yYPL032 with pYPL046, <i>ΔYPT1</i> , <i>ΔYAP3</i>                                               | This study |
| yYPL066   | yYPL032 with pYPL048, <i>ΔYAP3</i>                                                              | This study |
| yFJ440    | <i>MATa his3Δ1 leu2Δ0 met15Δ0 ura3Δ0</i><br><i>SynV&amp;X</i>                                   | This study |
| zYFW005   | <i>MATa his3Δ1 leu2Δ0 met15Δ0</i><br><i>SynV ::URA3 &amp;X</i>                                  | This study |
| yYPL0-1   | <i>MATa his3Δ1 leu2Δ0 met15Δ0 ura3Δ0</i><br><i>SynV ::Thaumatococcus-policistron-RFP &amp;X</i> | This study |
| yYPLI-2   | SCRaMbLEd strain from the yYPL0-1                                                               | This study |
| yYPLII-7  | SCRaMbLEd strain from the yYPLI-2                                                               | This study |
| yYPLIII-5 | SCRaMbLEd strain from the yYPLII-7                                                              | This study |
| yYPLIV-4  | SCRaMbLEd strain from the yYPLIII-5                                                             | This study |
| yYPLV-4   | SCRaMbLEd strain from the yYPLIV-4                                                              | This study |
| yYPL067   | yYPL032 with pYPL049, <i>ΔYPT1</i>                                                              | This study |
| yYPL068   | yYPL032 with pYPL050, <i>ΔYPT1</i>                                                              | This study |
| yYPL069   | yYPL032 with pYPL051, <i>ΔYPT1</i>                                                              | This study |
| yYPL070   | yYPL032 with pYPL052, <i>ΔYPT1</i>                                                              | This study |
| yYPL071   | yYPL032 with pYPL053, <i>ΔYPT1</i>                                                              | This study |
| yYPL072   | yYPL032 with pYPL054, <i>ΔYPT1</i>                                                              | This study |
| yYPL073   | yYPL032 with pYPL055, <i>ΔYPT1</i>                                                              | This study |
| yYPL074   | yYPL032 with pYPL056, <i>ΔYPT1</i>                                                              | This study |
| yYPL075   | yYPL032 with pYPL057, <i>ΔYPT1</i>                                                              | This study |
| yYPL076   | yYPL032 with pYPL058, <i>ΔYPT1</i>                                                              | This study |
| yYPL077   | yYPL032 with pYPL059, <i>ΔYPT1</i>                                                              | This study |
| yYPL078   | yYPL032 with pYPL060, <i>ΔYPT1</i>                                                              | This study |
| yYPL079   | yYPL032 with pYPL061, <i>ΔYPT1</i>                                                              | This study |
| yYPL080   | yYPL032 with pYPL048, <i>ΔYPT1</i> , <i>ΔYCL030C</i>                                            | This study |
| yYPL081   | yYPL032 with pYPL048, <i>ΔYPT1</i> , <i>ΔYER073W</i>                                            | This study |
| yYPL082   | yYPL032 with pYPL048, <i>ΔYPT1</i> , <i>ΔYER151C</i>                                            | This study |
| yYPL083   | yYPL032 with pYPL048, <i>ΔYPT1</i> , <i>ΔYJL047C</i>                                            | This study |

---

|         |                                                                                             |            |
|---------|---------------------------------------------------------------------------------------------|------------|
| yYPL084 | yYPL032 with pYPL048, <i>ΔYPT1</i> , <i>ΔYLR134W</i>                                        | This study |
| yYPL085 | yYPL032 with pYPL062, <i>ΔYPT1</i>                                                          | This study |
| yYPL086 | yYPL032 with pYPL063, <i>ΔYPT1</i>                                                          | This study |
| yYPL087 | yYPL032 with pYPL064, <i>ΔYPT1</i>                                                          | This study |
| yYPL088 | yYPL032 with pYPL065, <i>ΔYPT1</i>                                                          | This study |
| yYPL089 | yYPL032 with pYPL048, <i>ΔYPT1</i> , <i>ΔYER073W</i> ,<br><i>ΔYER151C</i>                   | This study |
| yYPL090 | yYPL032 with pYPL048, <i>ΔYPT1</i> , <i>ΔYER073W</i> ,<br><i>ΔYJL047C</i>                   | This study |
| yYPL091 | yYPL032 with pYPL048, <i>ΔYPT1</i> , <i>ΔYER151C</i> ,<br><i>ΔYJL047C</i>                   | This study |
| yYPL092 | yYPL032 with pYPL048, <i>ΔYPT1</i> , <i>ΔYER073W</i> ,<br><i>ΔYER151C</i> , <i>ΔYJL047C</i> | This study |
| yYPL093 | yYPL032 with pYPL048, pYPL066, <i>ΔYPT1</i>                                                 | This study |
| yYPL094 | yYPL032 with pYPL048, pYPL067, <i>ΔYPT1</i>                                                 | This study |
| yYPL095 | yYPL032 with pYPL048, pYPL068, <i>ΔYPT1</i>                                                 | This study |
| yYPL096 | yYPL032 with pYPL048, pYPL069, <i>ΔYPT1</i>                                                 | This study |
| yYPL097 | yYPL032 with pYPL048, pYPL070, <i>ΔYPT1</i>                                                 | This study |
| yYPL098 | yYPL032 with pYPL048, pYPL071, <i>ΔYPT1</i>                                                 | This study |
| yYPL099 | yYPL032 with<br>pYPL048, pYPL071, <i>ΔYPT1</i> , <i>ΔYER073W</i> , <i>ΔYJL047C</i>          | This study |
| yYPL100 | yYPL032 with<br>pYPL048, pYPL072, <i>ΔYPT1</i> , <i>ΔYER073W</i> , <i>ΔYJL047C</i>          | This study |
| yYPL101 | yYPL100 with pYPL073                                                                        | This study |
| yYPL102 | yYPL100 with pYPL074                                                                        | This study |
| yYPL103 | yYPL100 with pYPL075                                                                        | This study |

---

Table S3. Primers used in this study.

| Primer name | Sequence (5' to 3')                                                                | Sources    |
|-------------|------------------------------------------------------------------------------------|------------|
| HAC1-F      | AACACACATAAAACAAACAAAATGGAAATGACTGA<br>TTTTGA                                      | This study |
| HAC1-R      | AACACACATAAAACAAACAAAATGGAAATGACTGA<br>TTTTGA                                      | This study |
| Vps34-F     | AACACACATAAAACAAACAAAATGTCACTGAACAA<br>CATAAC                                      | This study |
| Vps34-R     | AATGTAGCGCTCTTACTTTATCAGGTCCGCCAGTA<br>TTGTG                                       | This study |
| KAR2-F      | AACACACATAAAACAAACAAAATGTTTTTCAACAG<br>ACTAAG                                      | This study |
| KAR2-R      | AATGTAGCGCTCTTACTTTACTACAATTCGTCGTG<br>TTCGA                                       | This study |
| PDI1-F      | AACACACATAAAACAAACAAAATGAAGTTTTCTGC<br>TGGTGC                                      | This study |
| PDI1-R      | AATGTAGCGCTCTTACTTTATTACAATTCATCGTG<br>AATGG                                       | This study |
| ERO1-F      | AACACACATAAAACAAACAAAATGAGATTAAGAAC<br>CGCCAT                                      | This study |
| ERO1-R      | AATGTAGCGCTCTTACTTTATTATTGTATATCTAGC<br>TTAT                                       | This study |
| BMH2-F      | AACACACATAAAACAAACAAAATGTCCCAAACCTCG<br>TGAAGA                                     | This study |
| BMH2-R      | AATGTAGCGCTCTTACTTTATTATTTGGTTGGTTCA<br>CCTT                                       | This study |
| SSO2-F      | AACACACATAAAACAAACAAAATGAGCAACGCTAA<br>TCCTTA                                      | This study |
| SSO2-R      | AATGTAGCGCTCTTACTTTATTACTTTCTTGTTTCC<br>ACAA                                       | This study |
| loxp-F      | ATAACTTCGTATAATGTACATTATACGAAGTTATT<br>CATTATCAATACTGCCATT                         | This study |
| loxp-R      | ATAACTTCGTATAATGTACATTATACGAAGTTATT<br>TACTCCGCAACGCTTTTCT                         | This study |
| loxpl-F     | TCGACGGTATCGATAAAGCTATAACTTCGTATAAT<br>GTACA                                       | This study |
| loxpl-R     | CGGGCTGCAGGAATTGAATTATAACTTCGTATAAT<br>GTACA                                       | This study |
| TDH3+Loxp-F | TCGACGGTATCGATAAAGCTATAACTTCGTATAAT<br>GTACATTATACGAAGTTATTCATTATCAATACTGC<br>CATT | This study |
| DIT1+Loxp-R | CGGGCTGCAGGAATTGAATTATAACTTCGTATAAT<br>GTACATTATACGAAGTTATTTACTCCGCAACGCTT<br>TTCT | This study |
| PDI1+HAC1-F | CCATTCACGATGAATTGTAACAATCAAACATGGA<br>AATGACTGATTTTGA                              | This study |
| HAC1+PDI1-R | GCACCAGCAGAAAACCTTCATGTTTGATTGTCATGA<br>AGTGATGAAGAAAT                             | This study |
| PDI1+ERO1-F | CCATTCACGATGAATTGTAACAATCAAACATGAG                                                 | This study |

---

|             | ATTAAGAACCGCCAT                                       |            |
|-------------|-------------------------------------------------------|------------|
| PDI1+EH-R   | TTACAATTCATCGTGAATGG                                  | This study |
| HAC1+ERO1-F | ATTTCTTCATCACTTCATGACAATCAAACATGAGA<br>TTAAGAACCGCCAT | This study |
| HAC1+ERO1-R | TCATGAAGTGATGAAGAAAT                                  | This study |
| GENE-F      | TCGCGCGTTTCGGTGATGAC                                  | This study |
| YOS1-R      | GCAACAGGACTAGGATGAGTA                                 | This study |
| TDH2-R      | TTCATCTCTTCCACCCATGTC                                 | This study |
| YEL046C-R   | TTAGCATCCCTTCCCTTTGC                                  | This study |
| YHR033W-R   | TAGTTTTGCTGGCCGCATC                                   | This study |
| YMR323W-R   | TGCGGTATTTACACCCGCA                                   | This study |
| UBP9-R      | AACGAGGCGGTCTCTTTTTT                                  | This study |
| YER091C-R   | TGCCTTTTTTCGACGAAGAA                                  | This study |
| YGL009C-R   | TGGGAGGTCATCGAAAGAGA                                  | This study |
| YER138C-R   | CACCAGTCACAGAAAAGCAT                                  | This study |
| MSN2-F      | AACACACATAAAACAAACAAAATGACGGTCGACCA<br>TGATTT         | This study |
| MSN2-R      | AATGTAGCGCTCTTACTTTTATTAATGTCTCCATG<br>TTTTT          | This study |
| MSN4-F      | AACACACATAAAACAAACAAAATGCTAGTCTTCGG<br>ACCTAA         | This study |
| MSN4-R      | AATGTAGCGCTCTTACTTTATCAAAAATCACCGTG<br>CTTTT          | This study |
| RLI1-F      | AACACACATAAAACAAACAAAATGAGTGATAAAAA<br>CAGTCG         | This study |
| RIL1-R      | AATGTAGCGCTCTTACTTTATTAATACCGGTGTT<br>ATCCA           | This study |
| PAB1-F      | AACACACATAAAACAAACAAAATGGCTGATATTAC<br>TGATAAGACAG    | This study |
| PAB1-R      | AATGTAGCGCTCTTACTTTATTAAGCTTGCTCAGT<br>TTGTTGT        | This study |
| TIF4632-F   | AACACACATAAAACAAACAAAATGACTGACCAAAG<br>AGGTCCAC       | This study |
| TIF4632-R   | AATGTAGCGCTCTTACTTTATTAATCACTGTCCCC<br>ATCGTTA        | This study |
| TIF2-F      | AACACACATAAAACAAACAAAATGTCTGAAGGTAT<br>TACTGATATTGAAG | This study |
| TIF2-R      | AATGTAGCGCTCTTACTTTATTAGTTCAACAAGGT<br>AGCAATGTC      | This study |
| CDC33-F     | AACACACATAAAACAAACAAAATGTCCGTTGAAGA<br>AGTTAGCA       | This study |
| CDC33-R     | AATGTAGCGCTCTTACTTTATTACAAGGTGATTGA<br>TGGTTGAGG      | This study |
| YAP3U-F     | TCGACGGTATCGATAAAGCTATCAATTACTCTCGT<br>TCCAACAG       | This study |

---

|           |                                                    |            |
|-----------|----------------------------------------------------|------------|
| YAP3U-R   | ACCTGAGTATTCCCACAGTTAACAATTGCTTCAGC<br>CTTATTCT    | This study |
| YAP3D -F  | TTAAGAAAATCCTTGCTTAAATAGACTTTGACAAA<br>AATAACTTAC  | This study |
| YAP3D-R   | CGGGCTGCAGGAATTGAATTAATCCTGCCAGTCTT<br>GATTATTAC   | This study |
| YPT1U-F   | TCGACGGTATCGATAAAGCTAGTACACGTTTCAGTC<br>TCTCC      | This study |
| YPT1U-R   | ACCTGAGTATTCCCACAGTTATTAGTGCTTTTCTTG<br>TTTT       | This study |
| YPT1D-F   | TTAAGAAAATCCTTGCTTAAACAAGCGCGCCTCTA<br>CCTTG       | This study |
| YPT1D-R   | CGGGCTGCAGGAATTGAATTAAGATAAAAAGAGA<br>GCGTGATATAA  | This study |
| UBC1U-F   | TCGACGGTATCGATAAAGCTTTAAAATCCCTTCTG<br>GATAAAAAGGC | This study |
| UBC1U-R   | ACCTGAGTATTCCCACAGTTCGCTTACTTCTTACT<br>ACTACTACTT  | This study |
| UBC1D-F   | TTAAGAAAATCCTTGCTTAAATAGATAAAAAAAA<br>AACGCACCAAG  | This study |
| UBC1D-R   | CGGGCTGCAGGAATTGAATTACTGGAAGGCCCTT<br>ACTGTG       | This study |
| HRD1U-F   | TCGACGGTATCGATAAAGCTCCTGTATCCTCATTC<br>TATCCATATT  | This study |
| HRD1U-R   | ACCTGAGTATTCCCACAGTATTATTATTTTGTCTT<br>TCTC        | This study |
| HRD1D-F   | TTAAGAAAATCCTTGCTTAAATTGCATGTTTTATA<br>TTATACATAG  | This study |
| HRD1D-R   | CGGGCTGCAGGAATTGAATTTTATCAACCTTAGGA<br>TTTCTGCTTC  | This study |
| LEU-F     | AACTGTGGGAATACTCAGGTATC                            | This study |
| LEU-R     | TTAAGCAAGGATTTTCTTAACTTCT                          | This study |
| YPT1-F    | TCGCGCGTTTCGGTGATGA                                | This study |
| YPT1-R    | GGCCTTTTGCTCACATGTTCT                              | This study |
| GPD1-R    | GCTTTTCTGTAACGTTACCC                               | This study |
| MED2-R    | ACCGCATAGGGTAATAACTGAT                             | This study |
| AFT1-R    | GATACCGTCGACCTCGAGGG                               | This study |
| FHL1-R    | CAGCACATCTAACACCTCTACA                             | This study |
| YOS1-R    | GCAACAGGACTAGGATGAGTA                              | This study |
| YGL009C-R | TGGGAGGTCATCGAAAGAGA                               | This study |
| 2X-R      | GTCTACCACCAGCATCCAAA                               | This study |
| 3X-R      | TGTGATGCTCGTCAGGGG                                 | This study |
| 4X-R      | CAACTCGGTGCCGCATA                                  | This study |
